# Supplementary material for: Low-temperature rapid UV sintering of sputtered TiO2 for flexible perovskite solar modules
Source: Royal Society of Chemistry journal article supplement (doi:10.1039/d3ta05666j), 2023-12-07
Supplement: d3ta05666j1.pdf [file d3ta05666j1.pdf]

## Supplementary Information

### Low-Temperature Rapid UV Sintering of Sputtered TiO<sub>2</sub> for Flexible Perovskite Solar Modules

Yongseok Yoo<sup>a,b,§</sup>, Gabseok Seo<sup>c,§</sup>, Hee Jeong Park<sup>b,d,§</sup>, Jichan Kim<sup>b,e</sup>, Jihun Jang<sup>c</sup>, Woosum Cho<sup>b</sup>, Ji Hwan Kim<sup>a,f</sup>, Jooyeon Shin<sup>g</sup>, Jiseong Choi<sup>h</sup>, Donghyeon Lee<sup>i</sup>, Se-Woong Baek<sup>d</sup>, Sungkoo Lee<sup>b</sup>, Seong Min Kang<sup>h\*</sup>, Min-cheol Kim<sup>i\*</sup>, Yung-Eun Sung<sup>a,f\*</sup>, and Seunghwan Bae<sup>b</sup>

a. School of Chemical and Biological Engineering, Seoul National University, Seoul 08826, Republic of Korea

b. Green and Sustainable Materials R&D Department, Korea Institute of Industrial Technology (KITECH), Cheonan 31056, Republic of Korea

c. Frontier Energy Solution Co., Ltd., Seoul National University, Seoul 08826, Republic of Korea

d. Department of Chemical and Biological Engineering, Korea University, Seoul 02481, Republic of Korea

e. Department of Chemical Engineering, Hanyang University, Seoul 04763, Republic of Korea

f. Center for Nanoparticle Research, Institute for Basic Science (IBS), Seoul 08826, Republic of Korea

g. Advanced Photovoltaics Research Center, Korea Institute of Science and Technology (KIST), Seoul 02792, Republic of Korea

h. Department of Mechanical Engineering, Chungnam National University, Daejeon 34134, Republic of Korea

i. School of Mechanical Engineering, Pusan National University, Busan 46241, Republic of Korea

\* Email: [shbae83@kitech.re.kr](mailto:shbae83@kitech.re.kr), [ysung@snu.ac.kr](mailto:ysung@snu.ac.kr), [mckim90@pusan.ac.kr](mailto:mckim90@pusan.ac.kr), [smkang@cnu.ac.kr](mailto:smkang@cnu.ac.kr)

§ These authors contributed equally to this work.

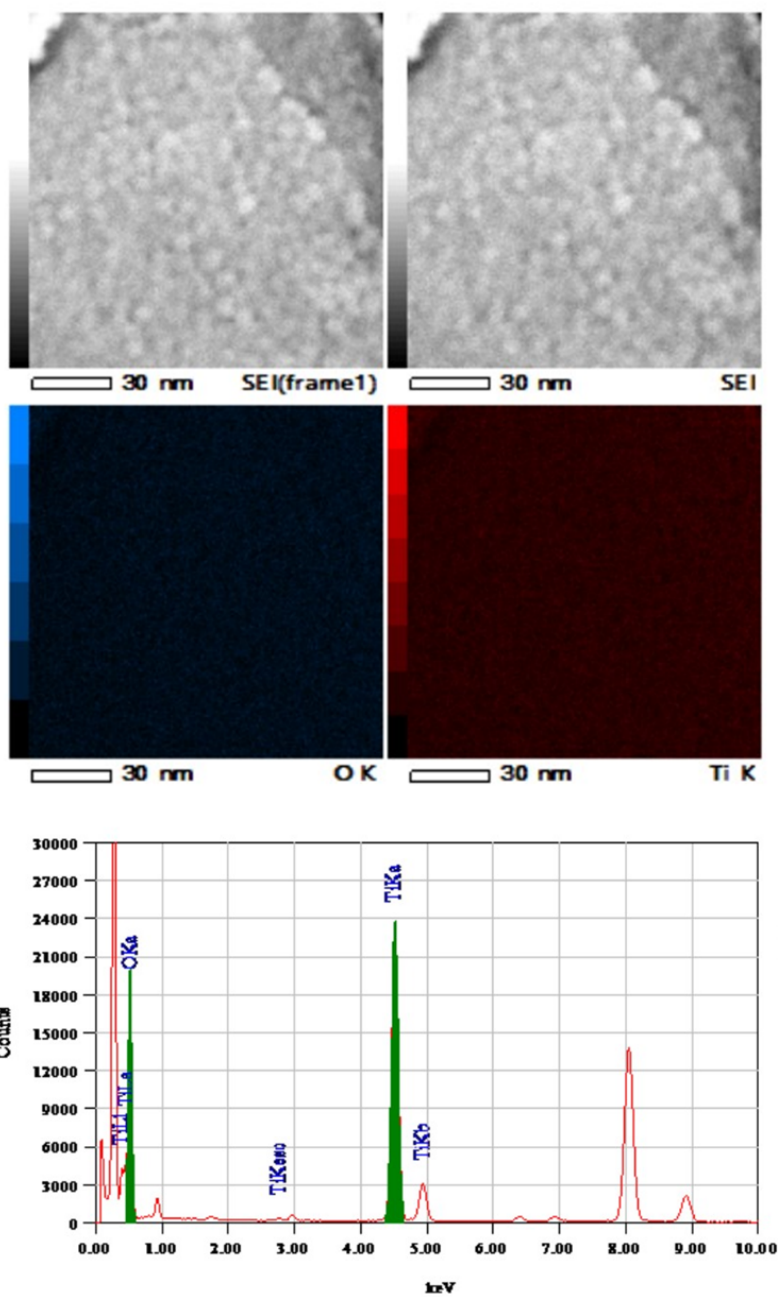

Figure S1. STEM images and EDS data for s-TiO<sub>2</sub> film.

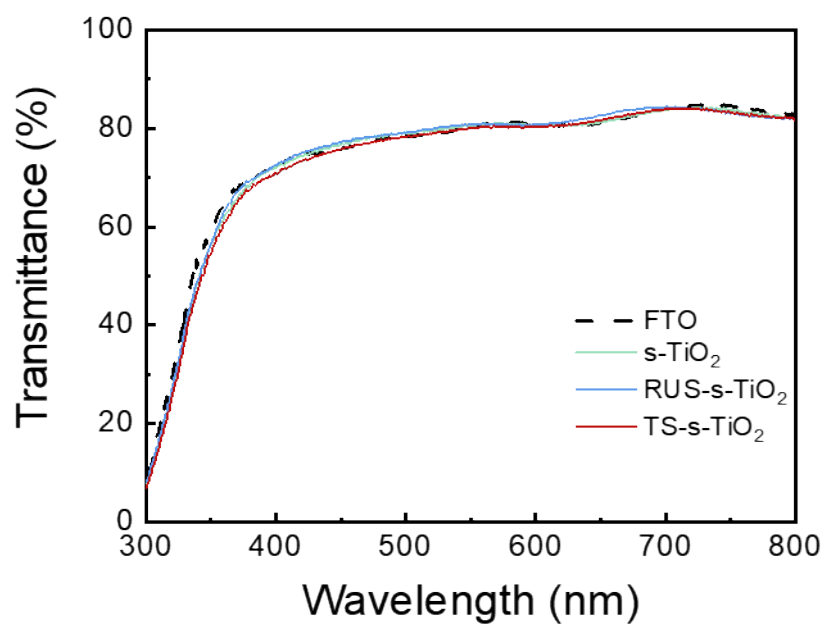

**Figure S2.** Transmittance spectra for FTO, s-TiO<sub>2</sub>, RUS- s-TiO<sub>2</sub>, and TS s-TiO<sub>2</sub> films.

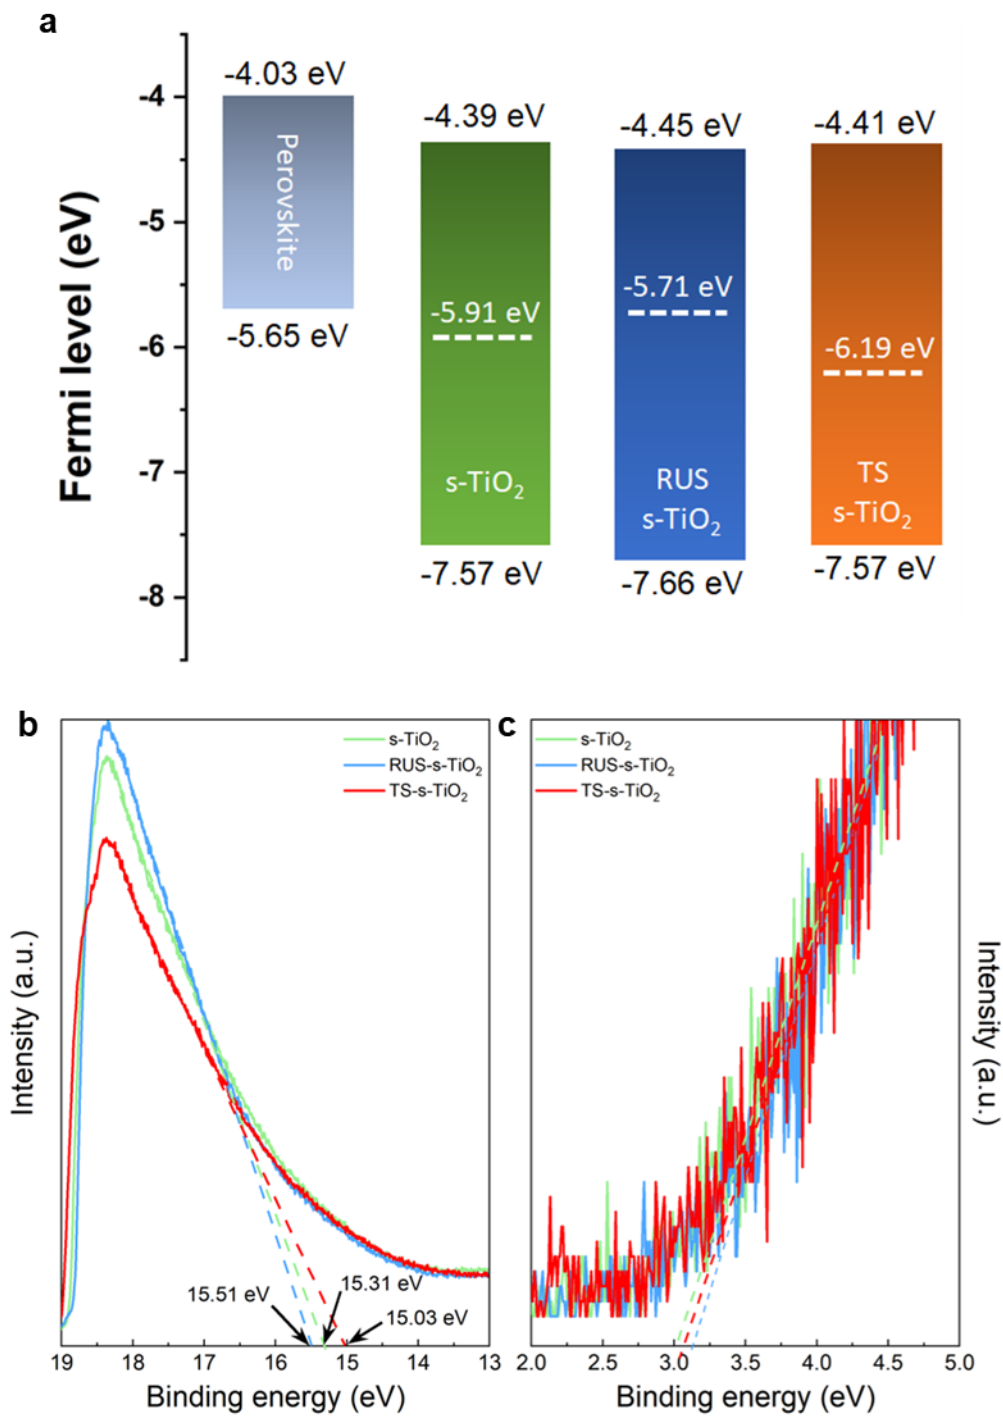

**Figure S3.** (a) Band-alignment schematics; (b) secondary-electron cutoff region and (c) valence-band region of ultraviolet photoelectron spectra.

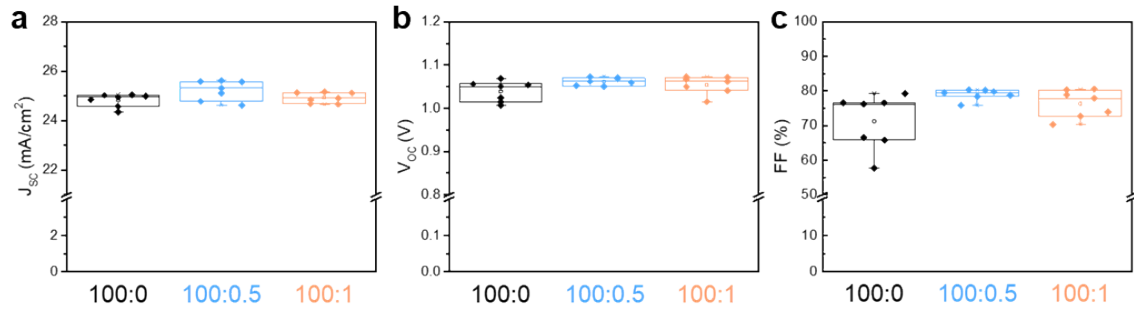

**Figure S4.** Box plots for photovoltaic parameters ((a)  $J_{SC}$ , (b)  $V_{OC}$ , (c) FF) with respect to the s-TiO<sub>2</sub> processing-gas composition (100:0, 100:0.5, and 100:1 for Ar:O<sub>2</sub>).

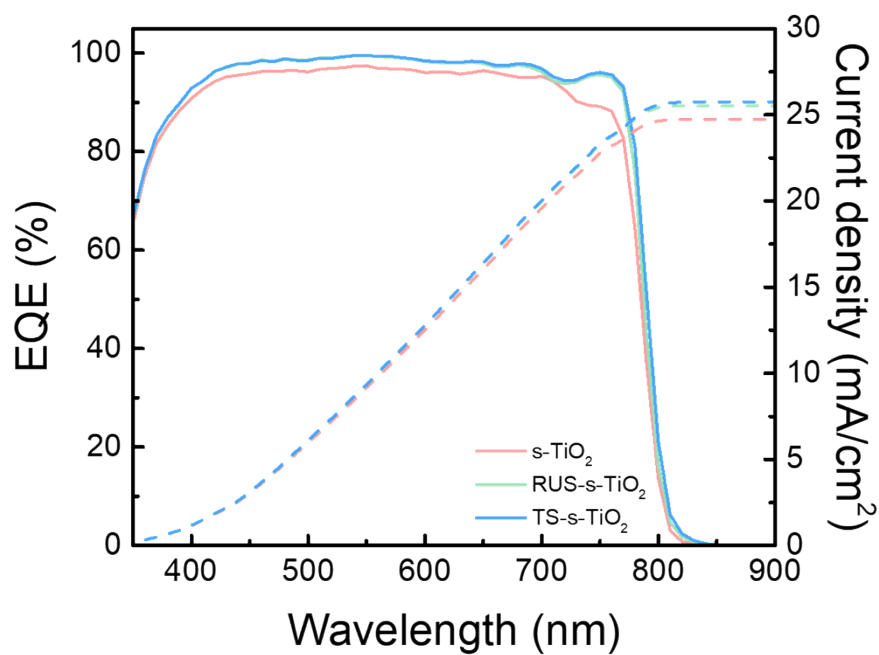

**Figure S5.** IPCE spectra and the current density calculated via integration for the perovskite solar cells based on s-TiO<sub>2</sub>, RUS-s-TiO<sub>2</sub>, and TS-s-TiO<sub>2</sub> layers.

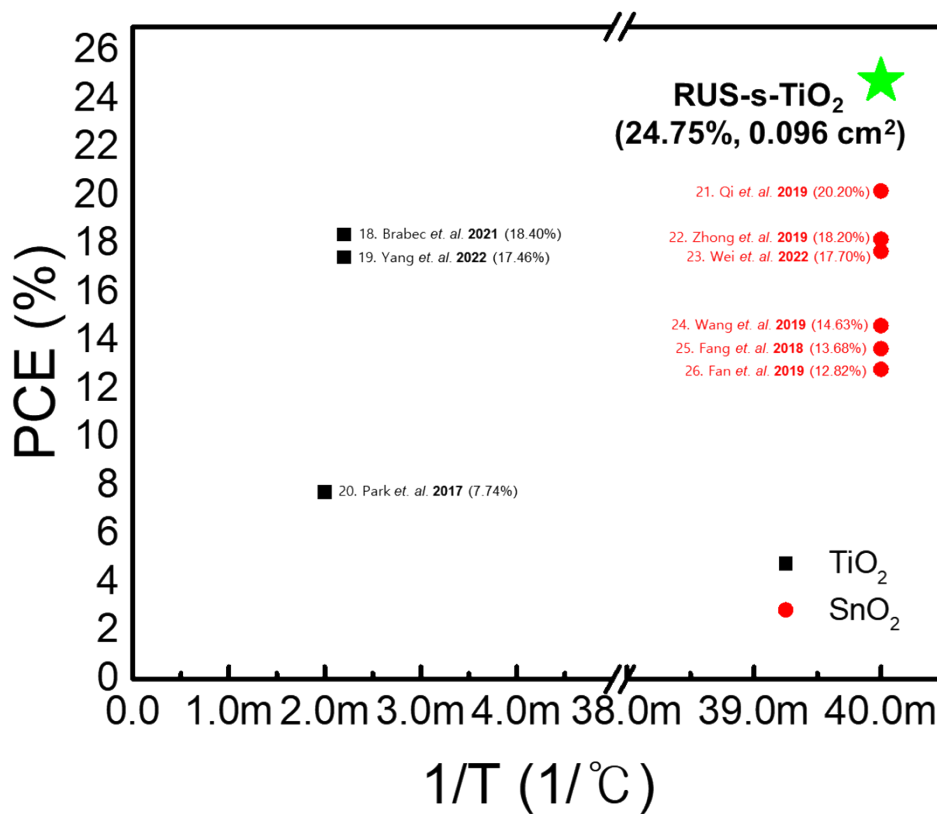

**Figure S6.** Comparison with leading PSCs using low-temperature-processed ETLs reported in the literature. The X-axis indicates the reciprocal of the process temperature.

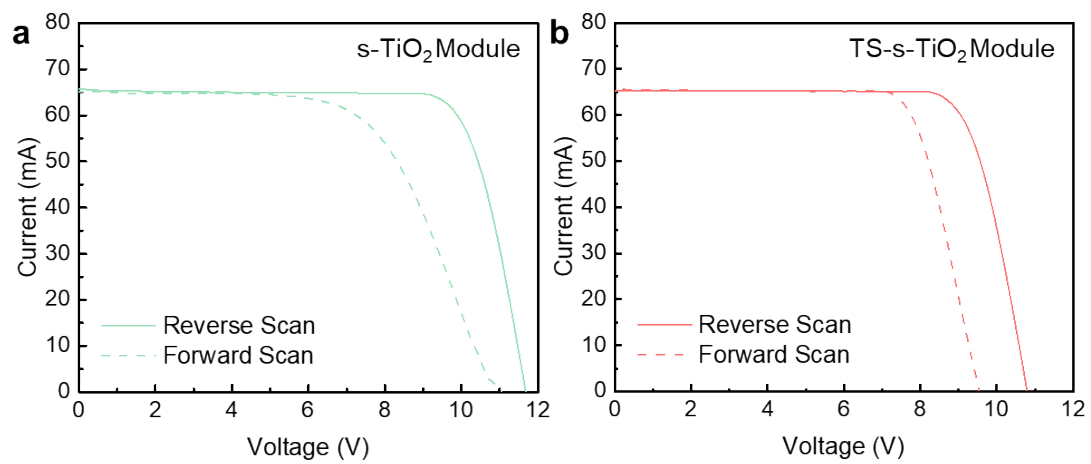

**Figure S7.** Representative I–V curves for perovskite solar modules with (a) s-TiO<sub>2</sub> and (b) TS-s-TiO<sub>2</sub>.



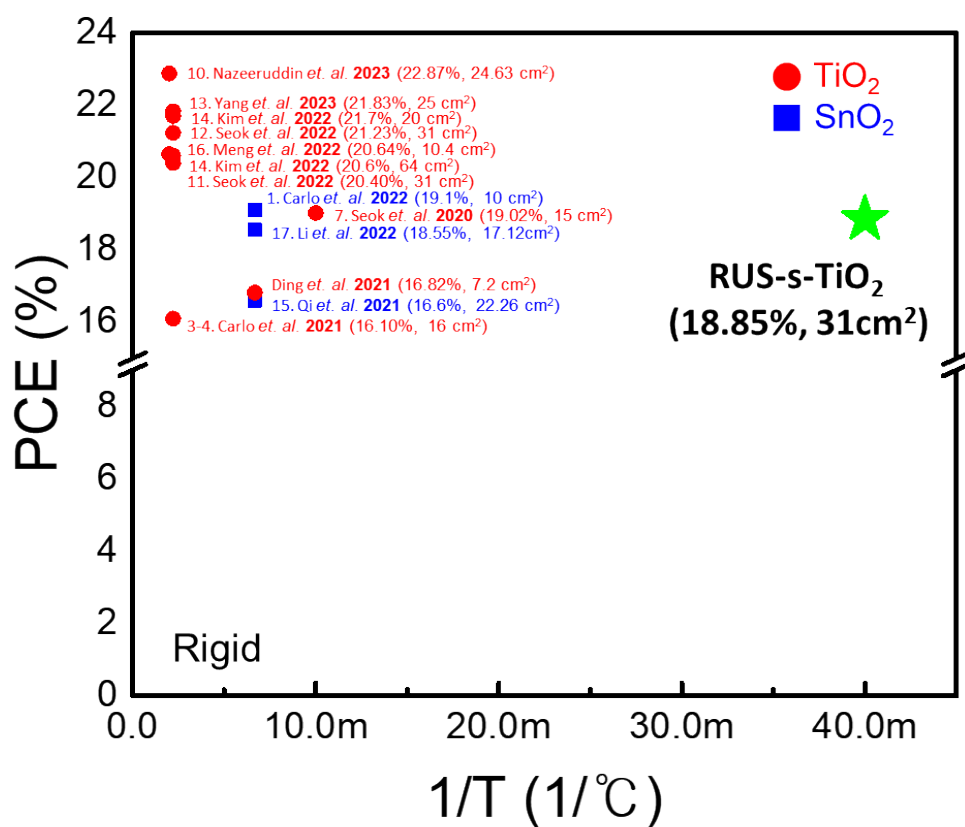

**Figure S8.** Comparison with leading large-area rigid-substrate PSC modules reported in the literature. The X-axis indicates the reciprocal of the process temperature.

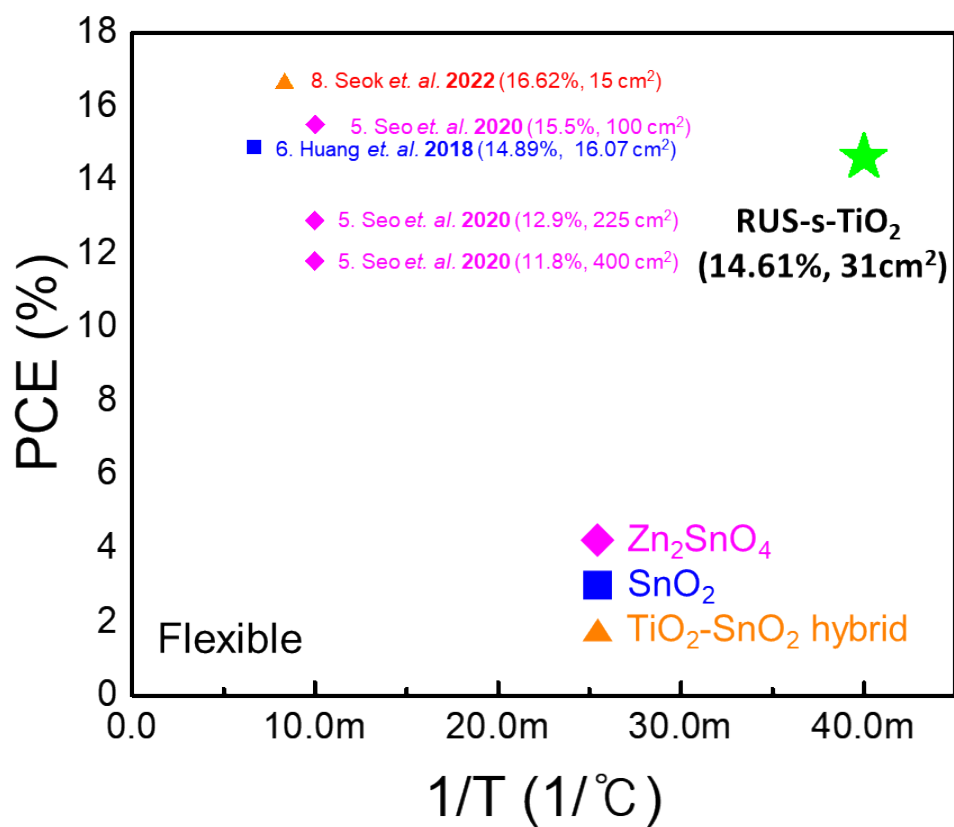

**Figure S9.** Comparison with leading large-area flexible PSC modules reported in the literature. The X-axis indicates the reciprocal of the process temperature.

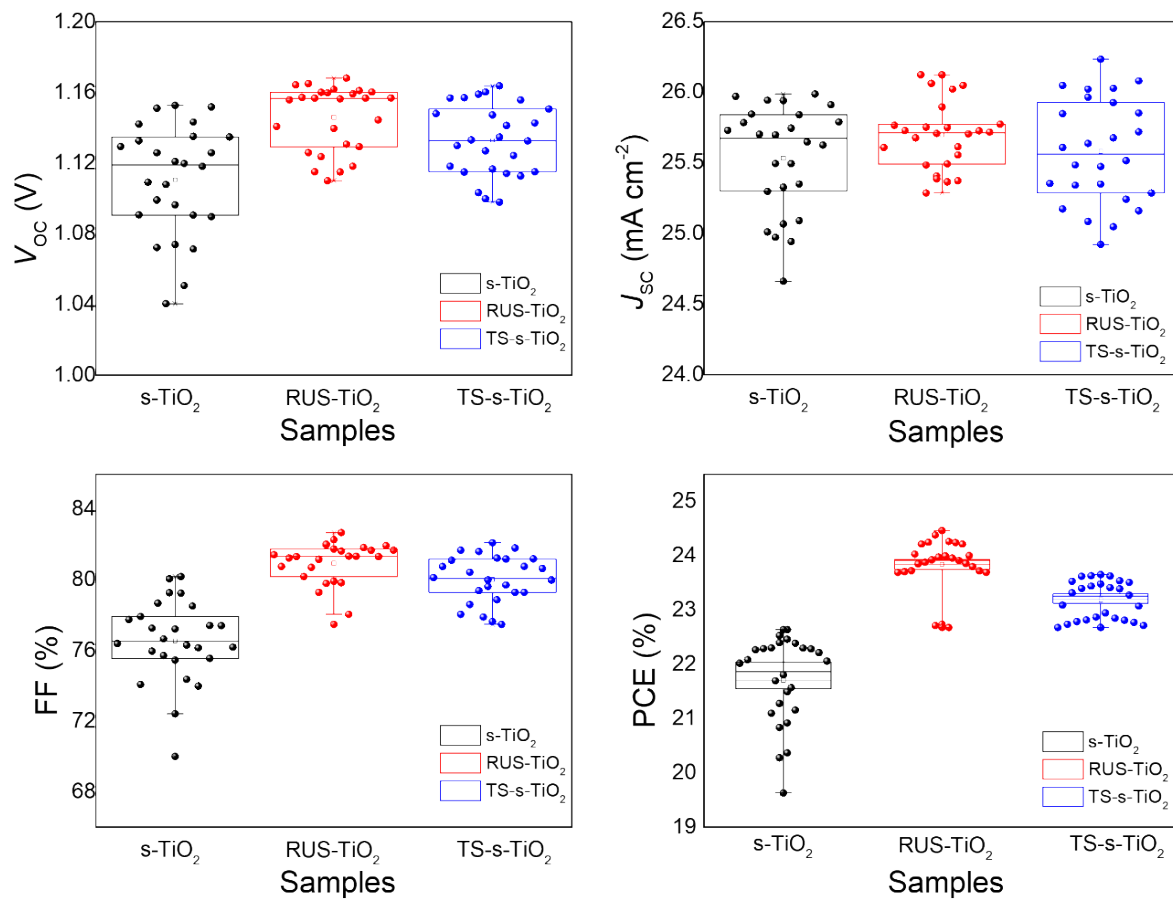

**Figure S10.** Box charts of photovoltaic parameters for s-TiO<sub>2</sub>, RUS-s-TiO<sub>2</sub>, TS-s-TiO<sub>2</sub> based PSCs.

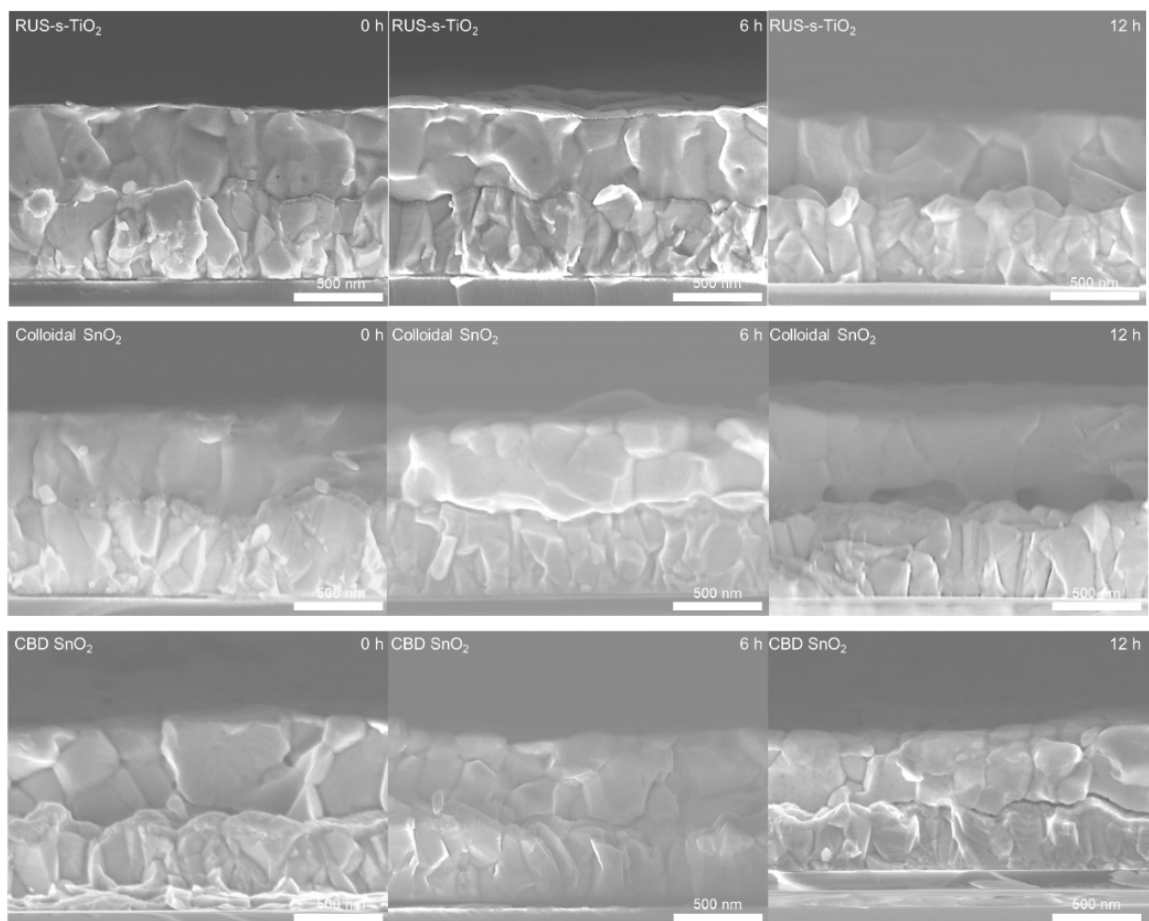

**Figure S11.** SEM cross-sectional images of the perovskite film, which were coated on RUS-s-TiO<sub>2</sub>, colloidal SnO<sub>2</sub> and CBD SnO<sub>2</sub> at 85 °C and 65% humidity during 12h, respectively.

**Table S1.** Mass and atomic ratios for the TEM and EDS data.

| Element     | (keV) | Mass % | Counts    | Sigma | Atom%  | K      |
|-------------|-------|--------|-----------|-------|--------|--------|
| O K         | 0.525 | 32.51  | 107492.89 | 0.18  | 59.04  | 1.2267 |
| Ti K (Ref.) | 4.508 | 67.49  | 273716.53 | 0.18  | 40.96  | 1.0000 |
| Total       |       | 100.00 |           |       | 100.00 |        |

**Table S2.** Optical bandgaps of each s-TiO<sub>2</sub> film.

|                             | s-TiO <sub>2</sub> | RUS-s-TiO <sub>2</sub> | TS-s-TiO <sub>2</sub> |
|-----------------------------|--------------------|------------------------|-----------------------|
| Bandgap E <sub>g</sub> (eV) | 3.18               | 3.21                   | 3.16                  |

**Table S3.** Carrier mobility of each s-TiO<sub>2</sub> film.

| Sample                      | Mobility (cm <sup>2</sup> V <sup>-1</sup> S <sup>-1</sup> )<br>Trap-filled region | V <sub>TFL</sub> (V) | N <sub>t</sub> (cm <sup>-3</sup> ) |
|-----------------------------|-----------------------------------------------------------------------------------|----------------------|------------------------------------|
| Previous work <sup>26</sup> | $6.21 \times 10^{-5}$                                                             |                      |                                    |
| s-TiO <sub>2</sub>          | $1.5 \times 10^{-4}$                                                              | 2.40                 | $5.97 \times 10^{18}$              |
| RUS-s-TiO <sub>2</sub>      | $1.8 \times 10^{-4}$                                                              | 2.15                 | $5.35 \times 10^{18}$              |
| TS-s-TiO <sub>2</sub>       | $2.2 \times 10^{-4}$                                                              | 4.11                 | $1.02 \times 10^{19}$              |

**Table S4.** Atomic ratios derived from Ti 2p XPS spectra.

| Sample                 | Ti <sup>4+</sup> 2p <sub>3/2</sub><br>[eV] | At<br>[%] | Ti <sup>3+</sup> 2p <sub>3/2</sub><br>[eV] | At<br>[%] | Ti <sup>4+</sup> 2p <sub>1/2</sub><br>[eV] | At<br>[%] | Ti <sup>3+</sup> 2p <sub>1/2</sub><br>[eV] | At<br>[%] |
|------------------------|--------------------------------------------|-----------|--------------------------------------------|-----------|--------------------------------------------|-----------|--------------------------------------------|-----------|
| s-TiO <sub>2</sub>     | 459.28                                     | 45.98     | 458.29                                     | 5.50      | 464.98                                     | 32.93     | 460.89                                     | 15.59     |
| RUS-s-TiO <sub>2</sub> | 459.29                                     | 47.11     | 458.23                                     | 4.93      | 465.01                                     | 33.17     | 461.01                                     | 14.78     |
| TS-s-TiO <sub>2</sub>  | 459.28                                     | 43.16     | 458.93                                     | 8.45      | 465.04                                     | 32.04     | 461.01                                     | 16.35     |



**Table S5.** Parameters of the TRPL spectra.

| Sample                 | $t_1$ (ns) | $A_1$ (%) | $t_1$ (ns) | $A_2$ (%) | $t_{avg}$ (ns) |
|------------------------|------------|-----------|------------|-----------|----------------|
| Perovskite film        | 550.97     | 27.42     | 5784.1285  | 72.58     | 2483.71        |
| s-TiO <sub>2</sub>     | 106.41     | 12.19     | 402.88     | 87.81     | 366.75         |
| RUS-s-TiO <sub>2</sub> | 85.5       | 11.21     | 336.06     | 88.79     | 307.96         |
| TS-s-TiO <sub>2</sub>  | 90.31      | 6.97      | 361.78     | 93.03     | 342.87         |

$$\tau_{avg} = \frac{\sum_i \tau_i A_i}{\sum_i A_i} \quad y = y_0 + A_1 * \exp\left(-\frac{x}{\tau_1}\right) + A_2 * \exp\left(-\frac{x}{\tau_2}\right)$$

**Table S6.** Atomic ratios derived from O 1s X-ray photoelectron spectra.

| Sample                 | O 1s [eV] | At [%] | O 1s [eV] | At [%] |
|------------------------|-----------|--------|-----------|--------|
| s-TiO <sub>2</sub>     | 530.55    | 67.31  | 532.23    | 32.69  |
| RUS-s-TiO <sub>2</sub> | 530.58    | 72.60  | 532.10    | 27.40  |
| TS-s-TiO <sub>2</sub>  | 530.48    | 73.55  | 532.41    | 26.44  |

**Table S7.** Photovoltaic parameters for small-area PSCs with different s-TiO<sub>2</sub> layers (s-TiO<sub>2</sub>, RUS-s-TiO<sub>2</sub>, and TS-s-TiO<sub>2</sub>).

| Measurement            |         | V <sub>oc</sub><br>(V) | J <sub>sc</sub><br>(mA/cm <sup>2</sup> ) | FF<br>(%) | PCE<br>(%) |
|------------------------|---------|------------------------|------------------------------------------|-----------|------------|
| s-TiO <sub>2</sub>     | Forward | 1.125                  | 24.49                                    | 81.27     | 22.38      |
|                        | Reverse | 1.099                  | 24.88                                    | 75.11     | 20.54      |
| TS-s-TiO <sub>2</sub>  | Forward | 1.137                  | 26.08                                    | 81.39     | 24.14      |
|                        | Reverse | 1.113                  | 26.00                                    | 80.40     | 23.27      |
| RUS-s-TiO <sub>2</sub> | Forward | 1.151                  | 26.11                                    | 82.40     | 24.75      |
|                        | Reverse | 1.144                  | 26.17                                    | 82.15     | 24.59      |

**Table S8.** Photovoltaic parameters for perovskite solar modules with rigid and flexible substrates.

| Measurement                        |         | $V_{oc}$<br>(V) | $V_{oc}/$<br>cell | $I_{sc}$<br>(mA) | $J_{sc}$<br>(mA/cm <sup>2</sup> ) | $J_{sc} \times$ cell | FF<br>(%) | PCE<br>(%) |
|------------------------------------|---------|-----------------|-------------------|------------------|-----------------------------------|----------------------|-----------|------------|
| RUS-s-<br>TiO <sub>2</sub>         | Forward | 11.05           | 1.10              | 65.66            | 2.11                              | 21.18                | 74.33     | 17.40      |
|                                    | Reverse | 11.20           | 1.12              | 65.76            | 2.12                              | 21.21                | 79.21     | 18.82      |
| Flexible<br>RUS-s-TiO <sub>2</sub> | Forward | 9.82            | 0.98              | 1.95             | 19.58                             | 9.82                 | 69.38     | 13.35      |
|                                    | Reverse | 10.23           | 1.02              | 1.95             | 19.58                             | 10.23                | 72.93     | 14.61      |

**Table S9.** Photovoltaic parameters for rigid-substrate perovskite solar modules with s-TiO<sub>2</sub> and TS-s-TiO<sub>2</sub>.

| Measurement           | V <sub>oc</sub><br>(V) | V <sub>oc</sub> /<br>cell | I <sub>sc</sub><br>(mA) | J <sub>sc</sub><br>(mA/cm <sup>2</sup> ) | J <sub>sc</sub> × cell | FF<br>(%) | PCE<br>(%) |       |
|-----------------------|------------------------|---------------------------|-------------------------|------------------------------------------|------------------------|-----------|------------|-------|
| s-TiO <sub>2</sub>    | Forward                | 9.56                      | 0.95                    | 65.61                                    | 2.11                   | 21.16     | 75.35      | 15.26 |
|                       | Reverse                | 10.78                     | 1.07                    | 65.28                                    | 2.10                   | 21.05     | 78.27      | 17.78 |
| TS-s-TiO <sub>2</sub> | Forward                | 10.96                     | 1.09                    | 65.09                                    | 2.10                   | 20.99     | 61.48      | 14.15 |
|                       | Reverse                | 11.68                     | 1.16                    | 65.52                                    | 2.11                   | 21.13     | 78.56      | 19.39 |

## REFERENCES

1. L. Vesce, M. Stefanelli, L.A. Castriotta, A. Hadipour, S. Lammar, B. Yang, J. Suo, T. Aernouts, A. Hagfeldt, A.D. Carlo, *Solar RRL*, 2022, **6**, 2101095.
2. L. Gu, S. Wang, Y. Chen, Y. Xu, R. Li, D. Liu, X. Fang, X. Jia, N. Yuan, J. Ding, *ACS Applied Energy Materials*, 2021, **4**, 6883–6891.
3. L.A. Castriotta, F. Matteocci, L. Vesce, L. Cina, A. Agresti, S. Pescetelli, A. Ronconi, M. Löffler, M.M. Stylianakis, F. Di Giacomo et al., *ACS Applied materials & interfaces*, 2021, **13**, 11741–11754.
4. L. Vesce, M. Stefanelli, J.P. Herterich, L.A. Castriotta, M. Kohlstädt, U. Würfel, A.D. Carlo, *Solar RRL*, 2021, **5**, 2100073.
5. J. Chung, S.S. Shin, K. Hwang, G. Kim, K.W. Kim, D.S. Lee, W. Kim, B.S. Ma, Y.-K. Kim, T.-S. Kim, J. Seo, *Energy & Environmental Science*, 2021, **13**, 4854.
6. T. Bu, J. Li, F. Zheng, Z. Chen, X. Wen, Z. Ku, Y. Peng, J. Zhong, Y.-B. Cheng, F. Huang, *Nature Communication*, 2018, **9**, 4609.
7. M.J. Paik, Y. Lee, H.-S. Yun, S.-U. Lee, S.-T. Hong, S.I. Seok, *Advanced Energy Materials*, 2020, **20210**, 2001799.
8. M.J. Paik, J.W. Yoo, J. Park, E. Noh, H. Kim, S.-G. Ji, Y.Y. Kim, S.I. Seok, *ACS Energy Letters*, 2022, **7**, 1864–1870.
9. M. Kam, Q. Zhang, D. Zhang, Z. Fan, *Scientific reports* 2019, **9**, 6963.
10. Y. Ding, B. Ding, H. Kanda, O.J. Usiobo, T. Gallet, Z. Yang et al., *Nature Nanotechnology*, 2022, **17**, 598–605.
11. J.W. Yoo, J. Jang, U. Kim, Y. Lee, S.-G. Ji, E. Noh, S. Hong, M. Choi, S.I. Seok, *Joule*, 2021, **5**, 2420–2424.
12. J.W. Yoo, E. Noh, J. Jang, K.S. Lee, J. Byeon, M. Choi, J. Im, S.I. Seok, *Joule*, 2023, **7**, 797–798.
13. M. Jeong, I.W. Choi, K. Yim, S. Jeong et al., *Nature Photonics*, 2022, **16**, 119–125.
14. M.J. Kim, J. Jeong, H. Lu, F.T. Eickemeyer, Y. Liu et al., *Science*, 2022, **375**, 302–306.
15. Z. Liu, L. Qiu, L.K. Ono, S. He, Z. Hu, M. Jiang, G. Tong, Z. Wu, Y. Jiang, D.-Y. Son, Y. Dang, S. Kazaoui, Y. Qi, *Nature Energy*, 2020, **5**, 596–604.
16. Y. Li, Z. Chen, B. Yu, S. Tan, Y. Cui, H. Wu, Y. Luo, J. Shi, D. Li, Q. Meng, *Joule*, 2022, **6**, 676–689.
17. S. Zhang, R. Guo, H. Zeng, X. Liu, S. You, M. Li, L. Luo, M. Lira-Cantu, L. Li, F. Liu, X. Zheng, G. Liao, X. Li, *Energy & Environmental Science*, 2022, **15**, 244.

18. F. Shahvaranfard, N. Li, S. Hosseinpour, S. Hejazi, K. Zhang, M. Altomare, P. Schmuki, C.J. Brave, *Nano Select*, 2022, **3**, 990–997.
19. J. Kim, M. Kim, H. Kim, J. Yang, *Applied Science and Convergence Technology*, 2022, **31**, 116–119.
20. T. Hwang, S. Lee, J. Kim, J. Kim, C. Kim, B. Shin, B. Park, *Nano Research Letters*, 2017, **12**.
21. L. Qiu, Z. Liu, L.K. Ono, Y. Jiang, D.-Y. Son, Z. Hawash, Y. Qi, *Advanced Functional Materials*, 2019, **29**, 1806779.
22. G. Bai, Z. Wu, J. Li, T. Bu, W. Li, F. Huang, Q. Zhang, Y.-B. Cheng, J. Zhong, *Solar Energy*, 2019, **183**, 306–314.
23. Z. Fang, L. Yang, Y. Jing, K. Liu, H. Feng, B. Deng, L. Zheng, C. Cui, C. Tian, L. Xie, *Chinese Physics B*, 2022, **31**, 118801.
24. W. Sun, S. Wang, S. Li, X. Miao, Y. Zhu, C. Du, R. Ma, C. Wang, *Coatings*, 2019, **9**, 320.
25. H. Tao, Z. Ma, G. Yang, H. Wang, H. Long, H. Zhao, P. Qin, G. Fang, *Applied Surface Science*, 2018, **434**, 1336–1343.
26. M. Kam, Q. Zhang, D. Zhang, Z. Fan, *Scientific reports*, 2019, **9**, 6963.
